# Supplementary material
Source: MDPI journal article supplement (https://www.mdpi.com/2311-7524/8/6/545)
Supplement: s1 [file s1]

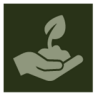

Article

# Supplementary Materials: Surface Moisture Induces Microcracks and Increases Water Vapor Permeance of Fruit Skins of Mango cv. Apple

Thomas O. Athoo, Andreas Winkler, Willis O. Owino and Moritz Knoche

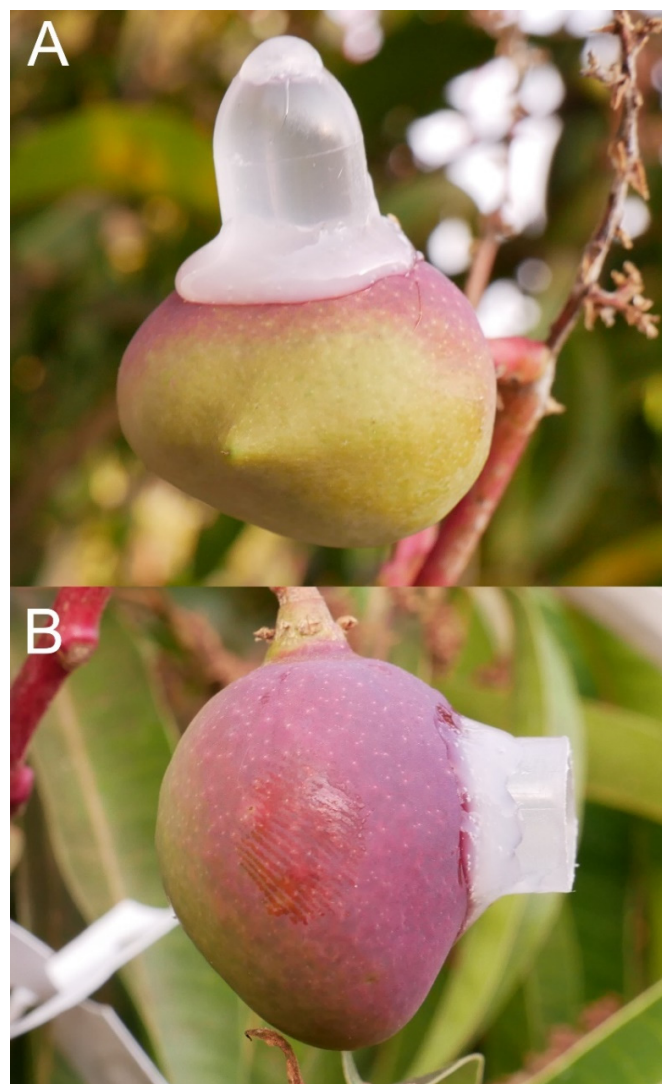

**Figure S1.** (A) Illustration of moisture application to the surface of a developing mango fruit. A polyethylene tube (PE) was mounted on the surface using silicone rubber and filled with distilled water. (B) Empty and open PE tube as shown in (B) or surface area on the opposite side of the fruit were used as controls.
